# Supplementary material
Source: PubMed Central journal article supplement (PMC4311200)
Supplement: supp_tpc.114.131607_tpc131607_SupplementalDataRev.pdf [file supp_tpc.114.131607_tpc131607_SupplementalDataRev.pdf]

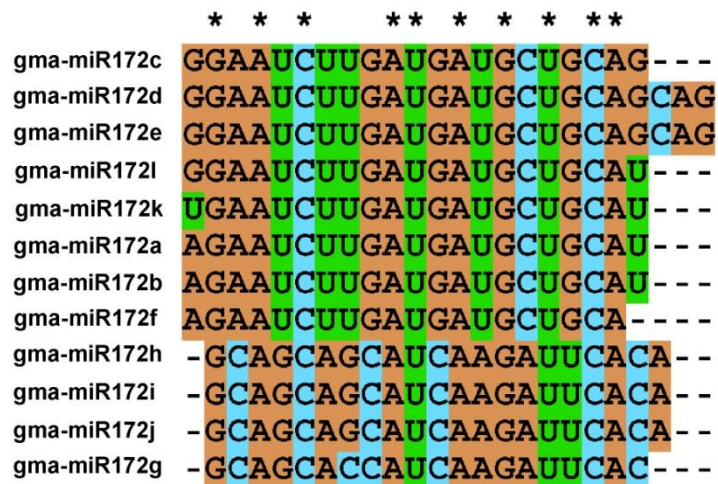

**Supplemental Figure 1.** Analysis of mature miRNA sequences of the miR172 family members.

Mature sequences of miR172 family members were aligned using software MEGA5. The stars indicate nucleotides conserved in all of the miR172 family members.

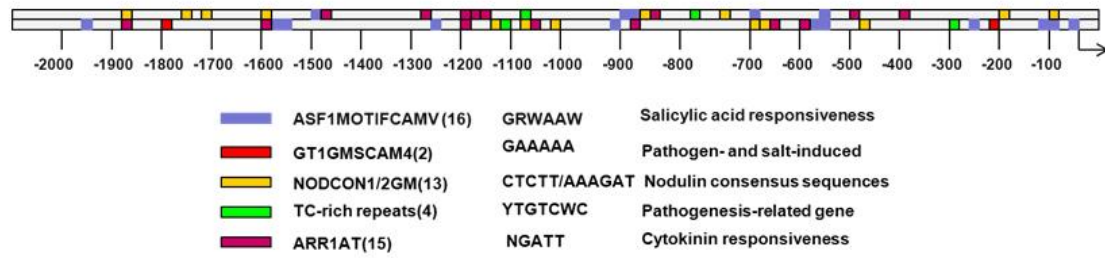

**Supplemental Figure 2.** Analysis of the miR172c promoter.

The promoter sequences (2000 bp) upstream of pre-miR172c (<http://www.phytozome.net/>) was chosen for *cis*-element analysis using software at [http://www.dna.affrc.go.jp/ PLACE/](http://www.dna.affrc.go.jp/PLACE/).

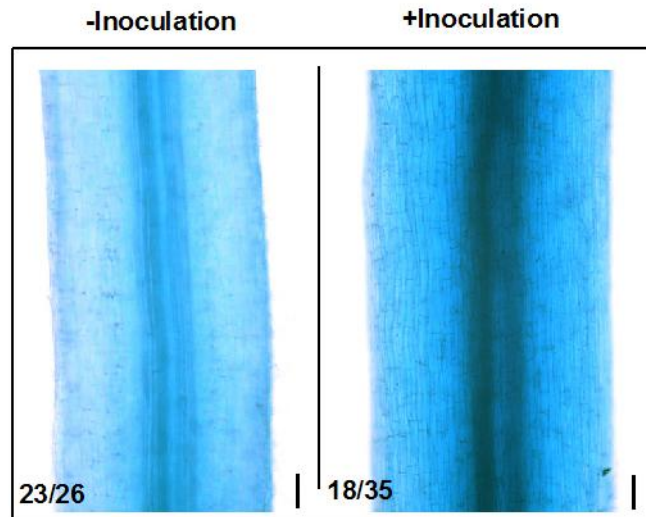

**Supplemental Figure 3.** Histochemical analysis of miR172c.

The construct harboring *promiR172c:GUS* was transformed using the hairy root transformation system. The chimeric transgenic plants were then inoculated with *B. japonicum*. The positive transgenic roots at 10 days after inoculation were analyzed using GUS assay. The number of independent transgenic roots showing the representative staining pattern out of the number of roots examined is indicated in each panel. Bar=100  $\mu$ m. -Inoculation: Without inoculation; + Inoculation: inoculated with rhizobia.

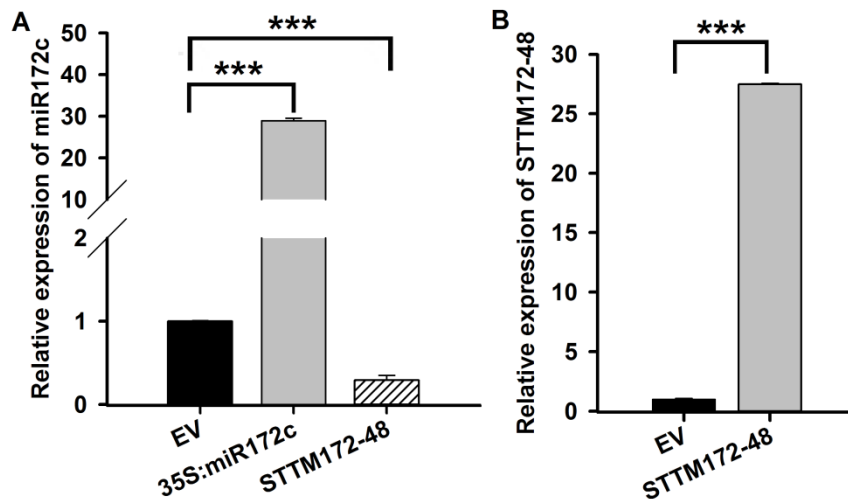

**Supplemental Figure 4.** qRT-PCR analysis of the miR172c transcript level.

**(A)** qRT-PCR analysis of the miR172c transcript level in transgenic roots expressing the empty vector (EV), *35S:miR172c*, and STTM172-48. The expression levels were normalized to that of soybean miR1520d. **(B)** qRT-PCR analysis of the STTM172-48 level in the transgenic hairy roots. The expression levels were normalized against the geometric mean of the soybean gene *ELF1b*. Expression levels shown are means  $\pm$  standard errors from three replicates. Student's *t*-test was performed; statistically significant results are marked with '\*\*\*' ( $P < 0.001$ ).



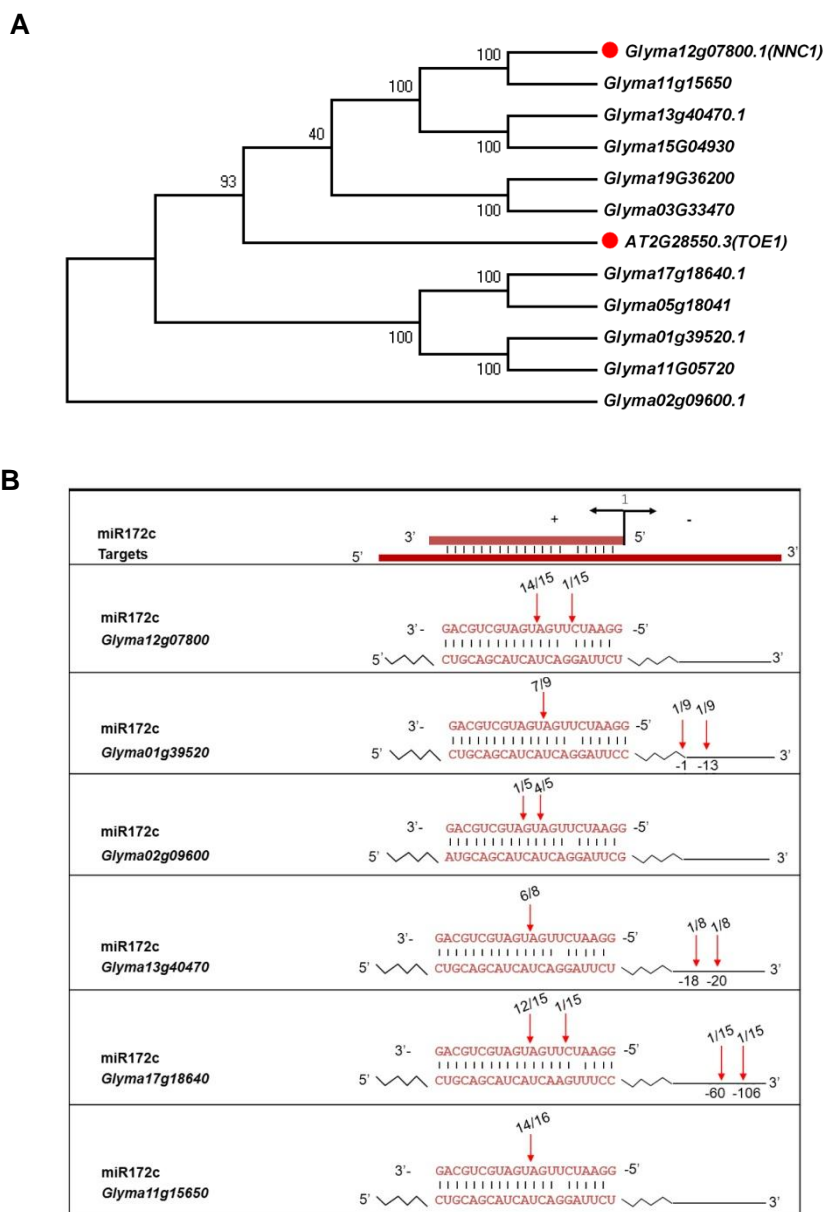

**Supplemental Figure 6** Prediction and experimental validation of the target genes of miR172c.

**(A)** Phylogenetic analysis of 11 predicted target genes of miR172c in soybean. The phylogenetic tree was constructed using MEGA5 phylogenetic analysis software. **(B)** Experimental validation of miR172c target genes and the cleavage sites using 5'RACE. Vertical arrows indicate the 5' termini of the miRNA-guided cleavage products, as identified by 5'-RACE, with the frequency of clones shown.

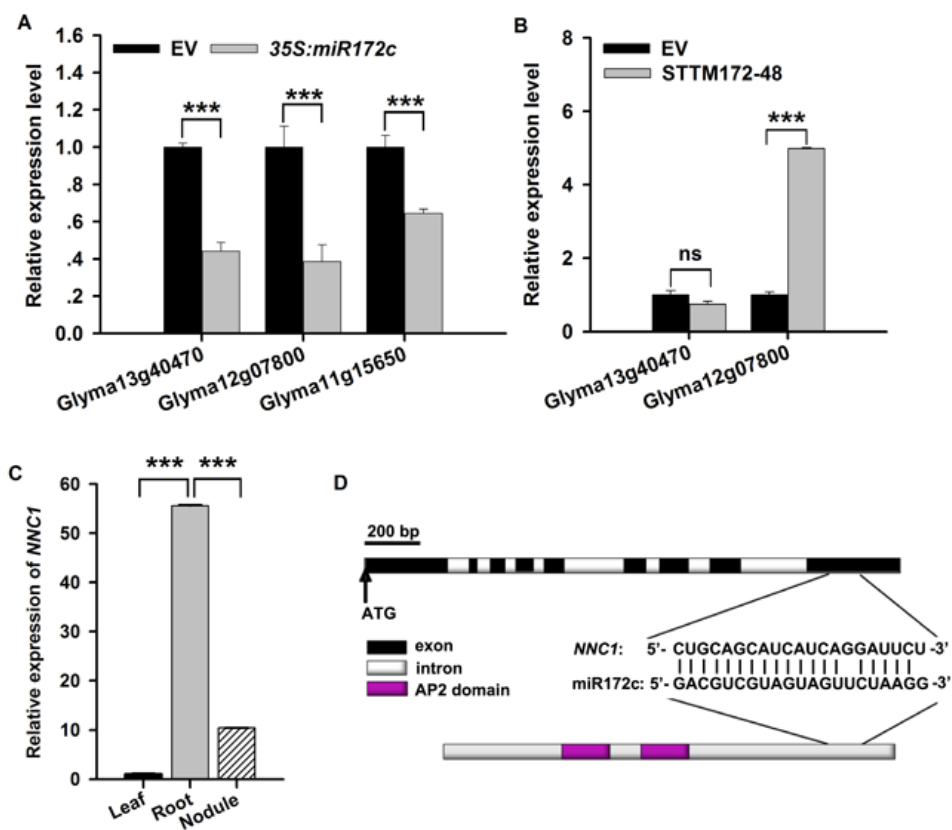

**Supplemental Figure 7.** Gene expression analysis of target genes and structures of *NNC1*.

**(A)** qRT-PCR analysis of the transcript levels of *glyma13g40470*, *glyma12g07800* and *glyma11g15650* in the transgenic roots transformed with the empty vector and *35S:miR172c* at 28 days after inoculation. **(B)** qRT-PCR analysis of the transcript levels of *glyma13g40470* and *glyma12g07800* in the transgenic roots transformed with the empty vector and *35S:STTM-miR172-48* (STTM172-48) at 6 days after inoculation. **(C)** qRT-PCR analysis of the transcript levels of *NNC1* in the leaf, root and nodule at 28 days after inoculation. The expression levels were normalized against the geometric mean of the soybean reference gene *GmELF1b*. Expression levels shown are means  $\pm$  standard errors from three replicates. The Student's *t*-test was performed and the significantly different treatments were marked with '\*\*\*' ( $P < 0.001$ ) and '\*\*' ( $P < 0.01$ ). ns: not significant ( $P > 0.05$ ). **(D)** *NNC1* gene contains 9 exons and 8 introns with the miR172c cleavage site in 9<sup>th</sup> exon.

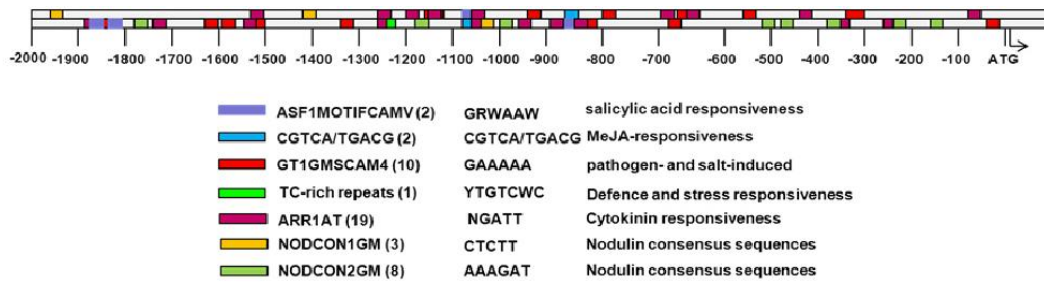

**Supplemental Figure 8.** Promoter analysis of *NNC1*.

The 2000 bp sequences upstream of start codon 'ATG' of the *NNC1* were chosen as promoter sequences (<http://www.phytozome.net/>) for analyzing *cis*-elements using software at <http://www.dna.affrc.go.jp/PLACE/>.



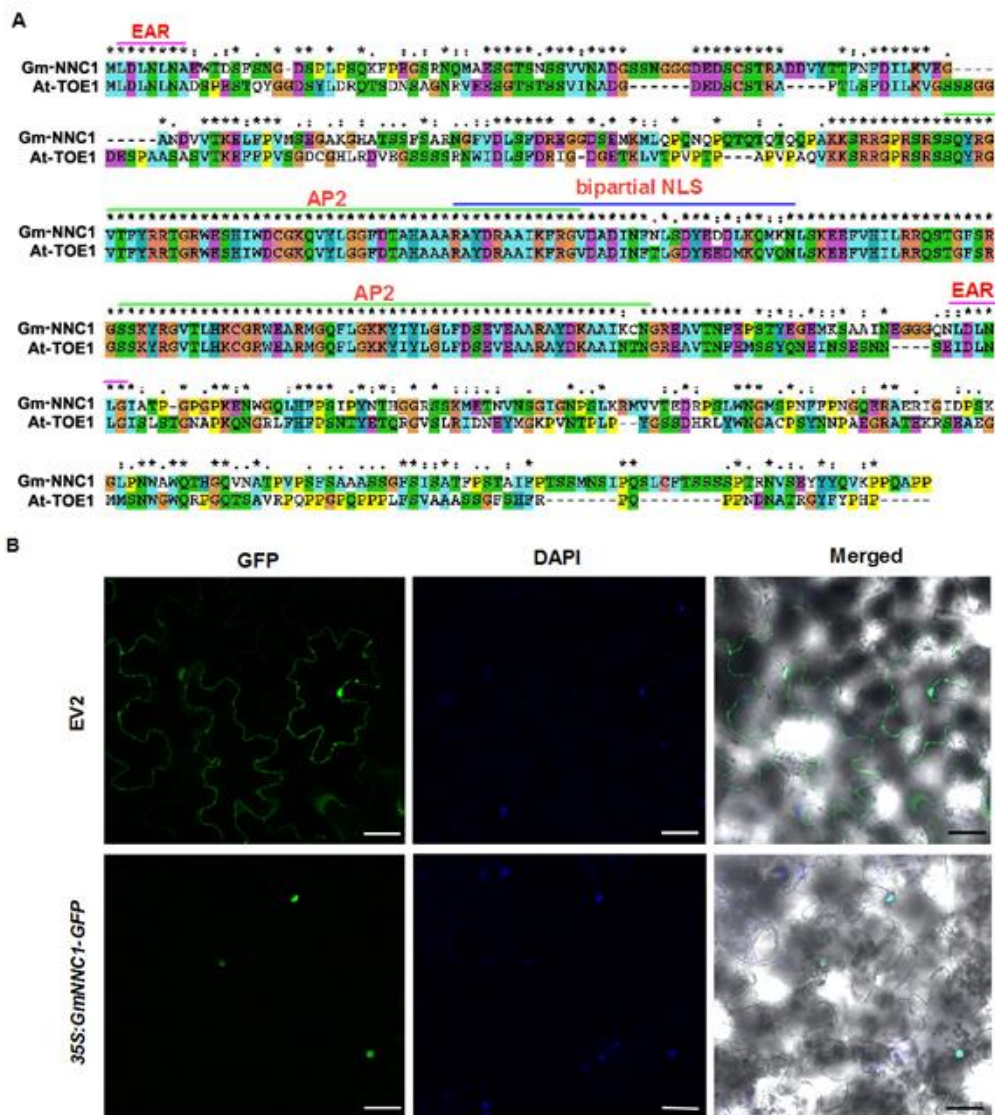

**Supplemental Figure 9. NNC1 protein analysis.**

(A) Soybean *NNC1* encodes a putative AP2 family protein with high similarity to *Arabidopsis* TOE1. The amino acid sequence of Gm-NNC1 and At-TOE1 were aligned using MEGA5 software. The green line indicates the AP2 domain. The purple line indicates the EAR motif. The blue line indicates the bipartial NLS motif, which is analyzed in the <http://rostlab.org/owiki/index.php/predict>. (B) NNC1 is localized in nucleus. The 35S:*GmNNC1* constructs were transformed in the tobacco leaves and the expression of NNC1 was imaged under confocal microscopy. DAPI, 4',6-diamidino-2- phenylindole. Bar=40 μm.

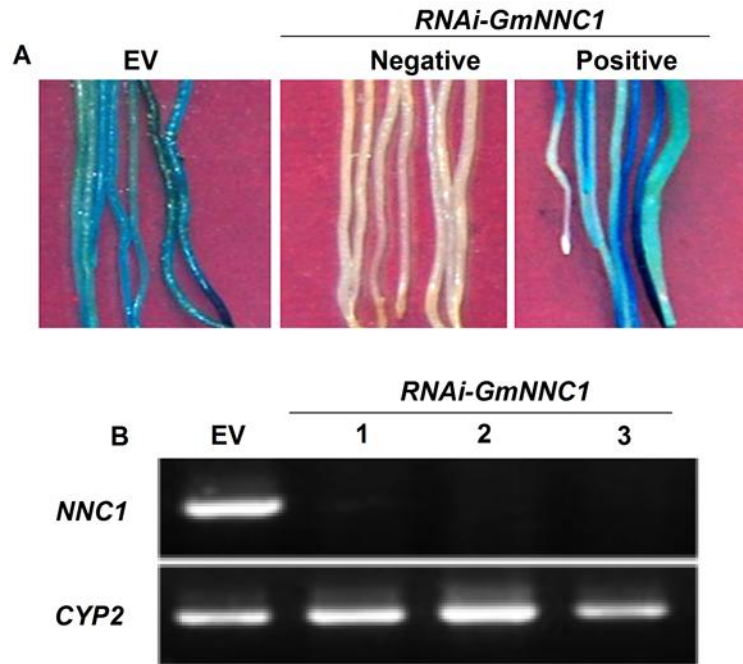

**Supplemental Figure 10.** Identification of *NNC1* RNAi knockdown roots.

**(A)** Identification of transgenic hairy roots harboring *RNAi-GmNNC1* and the empty vector by GUS assay. One-week-old hairy roots about 1-1.5 cm in length grown in root induction medium were collected and stained in GUS staining solution. The GUS-positive lines were used for gene expression analysis, rhizobium inoculation and nodulation evaluation. **(B)** RT-PCR analysis of *NNC1* expression in the GUS-positive roots transformed with *RNAi-GmNNC1* construct and the empty vector. After nodule numbers were counted, segments (2 cm in length) of *RNAi-GmNNC1* transgenic roots were used for expression analysis of *NNC1*. The content of *NNC1* mRNA was normalized with respect to *CYP2* mRNA.

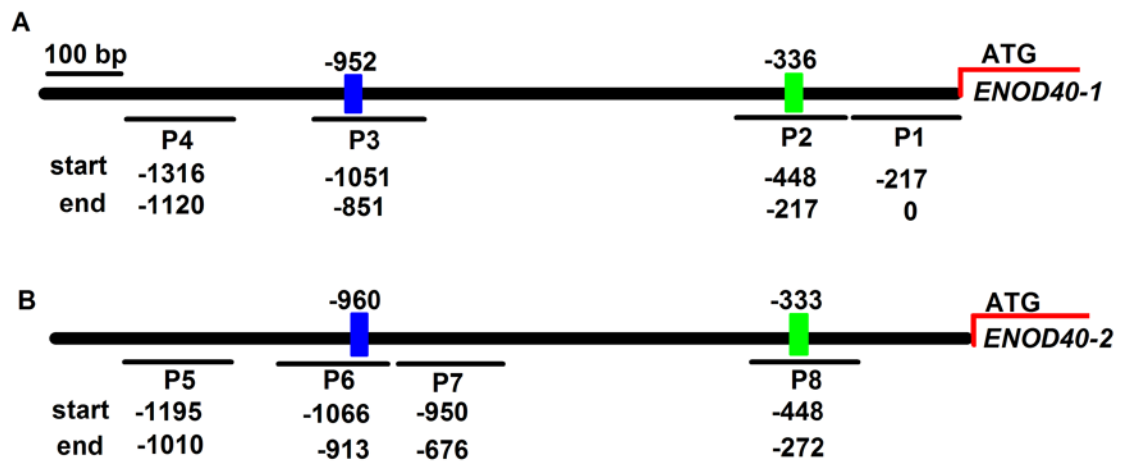

**Supplemental Figure 11.** Analysis of *ENOD40* promoters.

The promoters of *ENOD40-1* (1718 bp) (**A**) and *ENOD40-2* (1496 bp) (**B**) were analyzed. Both CCTCGT and TTAAGGTT (showing in blue and green respectively) binding sites can be observed in promoters of *ENOD40-1* and *ENOD40-2*. P1-P8 indicates eight DNA fragments in these two promoters.

**Supplemental Table 1.** The number of miR172 family members in plants.

| <b>Classes</b>     | <b>Families</b>       | <b>Species</b>               | <b>Members</b>                 |             |
|--------------------|-----------------------|------------------------------|--------------------------------|-------------|
| <b>Dicotyledon</b> | Brassicaceae          | <i>Arabidopsis lyrata</i>    | 6 (a-f)                        |             |
|                    |                       | <i>Arabidopsis thaliana</i>  | 5 (a-e)                        |             |
|                    |                       | <i>Brassica napus</i>        | 4 (a-d)                        |             |
|                    |                       | <i>Brassica oleracea</i>     | 2 (a-b)                        |             |
|                    |                       | <i>Brassica rapa</i>         | 2 (a-b)                        |             |
|                    | Asteraceae            | <i>Cynara cardunculus</i>    | 1                              |             |
|                    | Caricaceae            | <i>Carica papaya</i>         | 2 (a-b)                        |             |
|                    | Cucurbitaceae         | <i>Cucumis melo</i>          | 6 (a-f)                        |             |
|                    | Euphorbiaceae         | <i>Hevea brasiliensis</i>    | 1                              |             |
|                    |                       | <i>Manihot esculenta</i>     | 6 (a-f)                        |             |
|                    |                       | <i>Ricinus communis</i>      | 1                              |             |
|                    | Fabaceae              | <i>Acacia auriculiformis</i> | 1                              |             |
|                    |                       | <i>Glycine max</i>           | 12 (a-l)                       |             |
|                    |                       | <i>Lotus japonicus</i>       | 3 (a-c)                        |             |
|                    |                       | <i>Medicago truncatula</i>   | 4 (a-d)                        |             |
|                    |                       | <i>Vigna unguiculata</i>     | 1                              |             |
|                    | Lamiales              | <i>Digitalis purpurea</i>    | 2 (a-b)                        |             |
|                    |                       | <i>Salvia sclarea</i>        | 1                              |             |
|                    | Linaceae              | <i>Linum usitatissimum</i>   | 10 (a-j)                       |             |
|                    | Malvaceae             | <i>Gossypium hirsutum</i>    | 1                              |             |
|                    |                       | <i>Theobroma cacao</i>       | 5 (a-e)                        |             |
|                    | Ranunculaceae         | <i>Aquilegia caerulea</i>    | 2 (a-b)                        |             |
|                    | Rosaceae              | <i>Malus domestica</i>       | 15 (a-o)                       |             |
|                    |                       | <i>Prunus persica</i>        | 4 (a-d)                        |             |
|                    | Rutaceae              | <i>Citrus sinensis</i>       | 3 (a-c)                        |             |
|                    | Salicaceae            | <i>Populus trichocarpa</i>   | 9 (a-i)                        |             |
|                    | Solanaceae            | <i>Nicotiana tabacum</i>     | 9 (a-i)                        |             |
|                    |                       | <i>Solanum lycopersicum</i>  | 2 (a-b)                        |             |
|                    |                       | <i>Solanum tuberosum</i>     | 5(a-e)                         |             |
|                    | Vitaceae              | <i>Vitis vinifera</i>        | 4 (a-d)                        |             |
|                    | <b>Monocotyledons</b> |                              | <i>Aegilops tauschii</i>       | 1           |
|                    |                       |                              | <i>Brachypodium distachyon</i> | 3 (a, b, d) |
|                    |                       |                              | <i>Elaeis guineensis</i>       | 5 (a-e)     |
|                    |                       | <i>Oryza sativa</i>          | 4 (a-d)                        |             |
|                    |                       | <i>Sorghum bicolor</i>       | 6 (a-f)                        |             |
|                    |                       | <i>Zea mays</i>              | 5 (a-e)                        |             |

The sequences were downloaded from <http://www.mirbase.org/>

**Supplemental Table 2.** Sequence of gma-miR172 family members.

| <b>Family member</b> | <b>Mature sequence</b>   |
|----------------------|--------------------------|
| gma-miR172a          | AGAAUCUUGAUGAUGCUGCAU    |
| gma-miR172b          | AGAAUCUUGAUGAUGCUGCAU    |
| gma-miR172c          | GGAAUCUUGAUGAUGCUGCAG    |
| gma-miR172d          | GGAAUCUUGAUGAUGCUGCAGCAG |
| gma-miR172e          | GGAAUCUUGAUGAUGCUGCAGCAG |
| gma-miR172f          | AGAAUCUUGAUGAUGCUGCA     |
| gma-miR172g          | GCAGCACCAUCAAGAUUCAC     |
| gma-miR172h          | GCAGCAGCAUCAAGAUUCACA    |
| gma-miR172i          | GCAGCAGCAUCAAGAUUCACA    |
| gma-miR172j          | GCAGCAGCAUCAAGAUUCACA    |
| gma-miR172k          | UGAAUCUUGAUGAUGCUGCAU    |
| gma-miR172l          | GGAAUCUUGAUGAUGCUGCAU    |

The sequences were downloaded from <http://www.mirbase.org/>.

**Supplemental Table 3.** Results of miR172c target prediction in psRNATarget.

| <b>Gene</b>          | <b>Domain</b> | <b>Multiplicity</b> | <b>Inhibition</b> | <b>Cleavage site</b> |
|----------------------|---------------|---------------------|-------------------|----------------------|
| <i>Glyma01g39520</i> | AP2           | 1                   | Cleavage          | CDS                  |
| <i>Glyma02g09600</i> | AP2           | 1                   | Cleavage          | CDS                  |
| <i>Glyma03g33470</i> | AP2           | 1                   | Cleavage          | CDS                  |
| <i>Glyma05g18041</i> | AP2           | 1                   | Cleavage          | CDS                  |
| <i>Glyma11g15650</i> | AP2           | 1                   | Cleavage          | UTR                  |
| <i>Glyma11g05720</i> | AP2           | 1                   | Cleavage          | CDS                  |
| <i>Glyma13g40470</i> | AP2           | 1                   | Cleavage          | CDS                  |
| <i>Glyma15g04930</i> | AP2           | 1                   | Cleavage          | CDS                  |
| <i>Glyma12g07800</i> | AP2           | 1                   | Cleavage          | CDS                  |
| <i>Glyma17g18640</i> | AP2           | 1                   | Cleavage          | CDS                  |
| <i>Glyma19g36200</i> | AP2           | 1                   | Cleavage          | CDS                  |

Note: psRNATarget : *A Plant Small RNA Target Analysis Server*  
<http://plantgrn.noble.org/psRNATarget/>. Multiplicity indicates the the number of miRNA/target site pairs.

**Supplemental Table 4.** Primers used in this study.

|                         |                                            |
|-------------------------|--------------------------------------------|
| 35S:miR172c-Forward     | GGTACCCGGGGATCCCCTCATTCTACCTATTATTC<br>CG  |
| 35S:miR172c-Reverse     | GTTGGATCCCTTTAGTTTATTTAGGACTTCATTAGG<br>TC |
| STTM172c-48-Forward     | CGACCGGTCTGCAGCATCAC                       |
| STTM172c-48-Reverse     | CGGGATCCGGAATCTTGAT                        |
| 35S:GmNNC1-GFP-Forward  | CCAAGCTTATGTTAGATCTTAATCTCAATG             |
| 35S:GmNNC1-GFP-Reverse  | CGGGATCCCTATGGTGGTGCCTGCGG                 |
| RNAi-GmNNC1-Forward     | GGGGTACCACTAGTGTCCAAGGAGGAATTCGTAC         |
| RNAi-GmNNC1-Reverse     | CGGGATCCGAGCTCGGATCAATGCCGATTCTCTC         |
| GmNNC1-503-Forward      | GCGTCGACATGTTAGATCTTAATCTCAATG             |
| GmNNC1-503-Reverse      | CGGAATTCCTATGGTGGTGCCTGCGG                 |
| MBP-GmNNC1-Forward      | CGGGATCCATGTTAGATCTTAATCTCAATG             |
| MBP-GmNNC1-Reverse      | GCTCTAGACTATGGTGGTGCCTGCGG                 |
| promiR172c:GUS-Forward  | GGGGATCCCACTCATTCTACCTATTATTCCG            |
| promiR172c:GUS-Reverse  | GTTGGATCCCTTTAGTTTATTTAGGACTTCATTAGG<br>TC |
| proGmNNC1:GUS-Forward   | CGGAATTCGATCTACTTAAGTCAATAAC               |
| proGmNNC1:GUS-Reverse   | GAAGATCTCGTGGCGCTTCTTTTTTTTA               |
| 35S:GmNNC1-Forward      | CGACCGGTATGTTAGATCTTAATCTCAATG             |
| 35S:GmNNC1-Reverse      | GGGGATCCCTATGGTGGTGCCTGCGG                 |
| proENOD40-1-GFP-Forward | ACTAGGTTAATTAATGGGTTTGT                    |
| proENOD40-1-GFP-Reverse | GCTTCTTCAAGAACCATGGATGGAT                  |
| proENOD40-2-GFP-Forward | ACAGTACAGTATGGCTACATACAC                   |
| proENOD40-2-GFP-Reverse | GGATGGTTGTGAGCCAACAAAGCT                   |
| proENOD11-GFP-Forward   | AGGGTAACAAAGACGACGACGATT                   |
| proENOD11-GFP-Reverse   | GTTTTAGTTTCTGATGAATAACAC                   |
| qRT-NNC1-Forward        | CAATGGGCAGGAAAGAGC                         |
| qRT-NNC1-Reverse        | ATGGCAGTCGATGGAAAGGT                       |
| qRT-ENOD40-1-Forward    | TCTCTTTGAGTGGCAGAAGCA                      |

|                              |                                                          |
|------------------------------|----------------------------------------------------------|
| qRT-ENOD40-1-Reverse         | TGGAGTCCATTGCCTTTTTCG                                    |
| qRT-ENOD40-2-Forward         | TGGAGAGAAAGGGCAGATAC                                     |
| qRT-ENOD40-2-Reverse         | ATTGCCTACCTACTCATCTG                                     |
| qRT-NIN-Forward              | TGGCGCACCATGCTAACAT                                      |
| qRT-NIN-Reverse              | GGGTGTCATGGCAATCCTTT                                     |
| qRT-ELF1B-Forward            | GTTGAAAAGCCAGGGGACA                                      |
| qRT-ELF1B-Reverse            | TCTTACCCCTTGAGCGTGG                                      |
| qRT-CYP2-Forward             | CGGGACCAGTGTGCTTCTTCA                                    |
| qRT-CYP2-Reverse             | CCCCTCCACTACAAAGGCTCG                                    |
| qRT-miR172c-STTM-Forward     | CGACCGGTCTGCAGCATCAC                                     |
| qRT-miR172c-STTM-Reverse     | CGGGATCCGGAATCTTGAT                                      |
| SL-gma-miR172a/b/k/l-RT      | GTCGTATCCAGTGCAGGGTCCGAGGTATTTCGCAC<br>TGGATACGACATGCAG  |
| SL-gma-miR172c-RT            | GTCGTATCCAGTGCAGGGTCCGAGGTATTTCGCAC<br>TGGATACGACCTGCAG  |
| SL-gma-miR172d/e-RT          | GTCGTATCCAGTGCAGGGTCCGAGGTATTTCGCAC<br>TGGATACGACCTGCTG  |
| SL-gma-miR172f-RT            | GTCGTATCCAGTGCAGGGTCCGAGGTATTTCGCAC<br>TGGATACGACTGCAGC  |
| SL-gma-miR172g-RT            | GTCGTATCCAGTGCAGGGTCCGAGGTATTTCGCAC<br>TGGATACGACGTGAAT  |
| SL-gma-miR172h/i/j-RT        | GTCGTATCCAGTGCAGGGTCCGAGGTATTTCGCAC<br>TGGATACGACTGTGAA  |
| SL-miR1520d-RT               | GTCGTATCCAGTGCAGGGTCCGAGGTATTTCGCAC<br>TGGATACGACTTGTC A |
| gma-miR172a/b-qPCR-Forward   | GGACCAGAATCTTGATGATG                                     |
| gma-miR172c-qPCR-Forward     | GGACCGGAATCTTGATGATG                                     |
| gma-miR172d/e-qPCR-Forward   | GGACCGGAATCTTGATGATGCTG                                  |
| gma-miR172f-qPCR-Forward     | GGACCAGAATCTTGATGAT                                      |
| gma-miR172g-qPCR-Forward     | GGACCGCAGCACCATCAAG                                      |
| gma-miR172h/i/j-qPCR-Forward | GGACCGCAGCAGCATCAAGA                                     |
| gma-miR172k-qPCR-Forward     | GGACCTGAATCTTGATGATG                                     |
| gma-miR172l-qPCR-Forward     | GGACCGGAATCTTGATGATG                                     |
| gma-miR1520d-qPCR-Forward    | CGGACCATCAGAACATGACACG                                   |



|                             |                                                           |
|-----------------------------|-----------------------------------------------------------|
| gma-miRNA-universal-Reverse | GTGCAGGGTCCGAGGT                                          |
| RACE-glyma03g33470-in       | CGGAGTTAGTGATTGATGGTGGGA                                  |
| RACE-glyma03g33470-out      | CCGAGGCTGAATGTTGGATACCA                                   |
| RACE-glyma05g18170-in       | CACCTCAATAGTAAAGTTGTGGC                                   |
| RACE-glyma05g18170-out      | CCGTTTGTAGTTTGACTGACCC                                    |
| RACE-glyma11g15650-in       | GTGGGGGCTTAACCTAGTAATAATATTC                              |
| RACE-glyma11g15650-out      | AAGCAAGAGACAGCAATAAGGTG                                   |
| RACE-glyma11g05720-in       | TCCCTTCTTGTCTTTCACCC                                      |
| RACE-glyma11g05720-out      | TCCAGAGCGAGTTCCCAAAT                                      |
| RACE-glyma12g07800-in       | TTCAGATACATTGCGGGTAGGCG                                   |
| RACE-glyma12g07800-out      | CAGAAACATCGTTGTGCCAGTGC                                   |
| RACE-glyma13g40470-in       | GCGTTGCTACCTGGTGTGCTGGG                                   |
| RACE-glyma13g40470-out      | CCTAAGAGAACTGGAGCACTCAA                                   |
| RACE-glyma15g04930-in       | TGGGATGGTGCCTGCGAGGACTT                                   |
| RACE-glyma15g04930-out      | CTTCAGAACTTGTGTGGTGGGCT                                   |
| RACE-glyma17g18640-in       | GGGTGGAACCGTTGAAGGGTAAT                                   |
| RACE-glyma17g18640-out      | ATAGTAAAGTTGTGGTCTTGTGTGAGC                               |
| RACE-glyma19g36200-out      | GCAGAGTTCAAGAAGCCATCGGG                                   |
| RACE-glyma01g39520-out      | TGGCTCTCCCTATTCTTTCACCCA                                  |
| RACE-glyma02g09600-out      | CGGGTAGCCATTGTAAGCAA                                      |
| RT-GmNNC1-Forward           | ATGTTAGATCTTAATCTCAATG                                    |
| RT-GmNNC1-Reverse           | CGGGATCC CTATGGTGGT GCCTGCGG                              |
| Bar-Forward                 | AAGGATAGTGGGATTGTGCG                                      |
| Bar-Reverse                 | AGTCGGGAAACCTGTCTGTG                                      |
| G4DBD-Forward               | GGGGACAAGTTTGTACAAAAAAGCAGGCTATGAA<br>GCTACTGTCTTCTATCG   |
| G4DBD-Reverse               | GGGGACCACTTTGTACAAGAAAGCTGGGTCTATTG<br>ATTCGACCTCGACGATAC |
| GmNNC1-503-Forward          | GCGTCGACATGTTAGATCTTAATCTCAATG                            |
| GmNNC1-503-Reverse          | CGGAATTCCTATGGTGGTGCCTGCGG                                |
| GmNNC1DBD-Reverse           | GGGGACCACTTTGTACAAGAAAGCTGGGTCTATG<br>GTGGTGCCTGCGG       |

|                        |                                |
|------------------------|--------------------------------|
| ENOD40-ChIP-1-Forward  | AAGTAATAAGCAAATGGATAAT         |
| ENOD40-ChIP-1-Reverse  | GCTTCTTCAAGAACCATGGATGGAT      |
| ENOD40-ChIP-2-Forward  | TTGCTGGCATGGCTGGTGAGAG         |
| ENOD40-ChIP-2-Reverse  | ACTCAAAGCCCACTTTGCTTTC         |
| ENOD40-ChIP-3-Forward  | ATCAAAAGTCAAGCACGAATG          |
| ENOD40-ChIP-3-Reverse  | TCCTCGCCAAATTTTCAGCTT          |
| ENOD40-ChIP-4-Forward  | AGTGTGTAAGATAACAATTAGGT        |
| ENOD40-ChIP-4-Reverse  | ATTATCCATTTGCTTATTACTT         |
| ENOD40-ChIP-5-Forward  | ACAGTATGGCTACATACAC            |
| ENOD40-ChIP-5-Reverse  | AATATGTTACGAGGATTTGT           |
| ENOD40-ChIP-6-Forward  | ATTAGTGGATAGTAAGGAATTT         |
| ENOD40-ChIP-6-Reverse  | ATAATCCTCTTAAGTATTGAAT         |
| ENOD40-ChIP-7-Forward  | CTTGGAGGCTAAAACATATG           |
| ENOD40-ChIP-7-Reverse  | AGGCTTTTATTGCAGCAGTG           |
| ENOD40-ChIP-8-Forward  | ATTCCCATGTAAACCAGTAGAAG        |
| ENOD40-ChIP-8-Reverse  | GAAAGAAAATTGTAAGTACTGCGCTC     |
| probe-ENOD40-1-Forward | CTTTTAGCAAATCCTCGTAACATATTTCTA |
| probe-ENOD40-1-Reverse | TAGAAATATGTTACGAGGATTTGCTAAAAG |
| probe-ENOD40-2-Forward | CGGTAATTAGGTTAAGGTTTAGATTCAATA |
| probe-ENOD40-2-Reverse | TATTGAATCTAAACCTTAACCTAATTACCG |
